# Supplementary material for: Stability of Ranked Gene Lists in Large Microarray Analysis Studies
Source: Hindawi journal article supplement (doi:10.1155/2010/616358), 2010-01-01
Supplement: f1 [file 616358.f1.xls]

## Sheet: Breast_Colon
		Stability																	Standard Deviation of Stability (Meta-stability)
		Signal-to-noise Filter				InfoGain Filter				RelifF Filter				SVM-RFE Filter					Signal-to-noise Filter				Info Gain Filter				RelifF Filter				SVM-RFE Filter
Dataset	NumSamples	Overlap	W. Overlap	Spearman		Overlap	W. Overlap	Spearman		Overlap	W. Overlap	Spearman		Overlap	W. Overlap	Spearman			Overlap	W. Overlap	Spearman		Overlap	W. Overlap	Spearman		Overlap	W. Overlap	Spearman		Overlap	W. Overlap	Spearman
AP_Breast_Colon.arff	25	0.0524	0.0561901	0.0399762		0.1904	0.218372	0.167366		0.2368	0.27617	0.203683		0.0636	0.0705228	0.0488158			0.0200582	0.0200338	0.0152711		0.0354119	0.0432553	0.0393341		0.034	0.0425688	0.0315304		0.0203879	0.0248456	0.0215917
AP_Breast_Colon.arff	37.5	0.0848	0.100162	0.0751287		0.346	0.378491	0.268135		0.2604	0.305505	0.224863		0.072	0.0768356	0.0521109			0.0216256	0.0225376	0.0168522		0.0530723	0.0603884	0.0493464		0.0367967	0.0372432	0.0246084		0.0269258	0.0293716	0.0213908
AP_Breast_Colon.arff	50	0.07	0.0780911	0.0546297		0.4296	0.485414	0.356681		0.2644	0.294036	0.217838		0.0608	0.0633069	0.0433663			0.02	0.018999	0.016158		0.0440151	0.0485506	0.0475709		0.0375366	0.0423207	0.0335974		0.025807	0.0285179	0.0200901
AP_Breast_Colon.arff	62.5	0.1232	0.123279	0.0826614		0.5408	0.59204	0.420214		0.518	0.616257	0.470939		0.1008	0.112024	0.0797545			0.0273435	0.0265025	0.0232835		0.0316122	0.0353727	0.0317848		0.032532	0.0298039	0.0269271		0.027374	0.0271901	0.0191547
AP_Breast_Colon.arff	75	0.1776	0.216451	0.156974		0.6056	0.655236	0.477156		0.4284	0.517628	0.402004		0.07	0.0745426	0.0530218			0.0173877	0.0203443	0.0203407		0.0372022	0.0407341	0.0414006		0.0300943	0.0355517	0.0304857		0.0217945	0.0215071	0.0186234
AP_Breast_Colon.arff	87.5	0.1504	0.164954	0.114154		0.6248	0.700083	0.510226		0.44	0.527905	0.39619		0.058	0.0632911	0.0459881			0.0215019	0.0182521	0.0145104		0.0329292	0.0361472	0.0341863		0.0458258	0.0438176	0.0380771		0.0244949	0.0234437	0.0163404
AP_Breast_Colon.arff	100	0.262	0.312531	0.235762		0.6268	0.708424	0.521354		0.4052	0.475964	0.368269		0.0564	0.0649545	0.0461069			0.033541	0.0286757	0.0250396		0.0349667	0.0401636	0.0440126		0.0522111	0.058749	0.0499962		0.0262805	0.0310465	0.0218682
AP_Breast_Colon.arff	112.5	0.3128	0.360701	0.270123		0.6304	0.738186	0.570154		0.502	0.579857	0.44362		0.0476	0.0474891	0.0323802			0.0270062	0.0340998	0.0283423		0.0235372	0.024995	0.0322754		0.0380789	0.0397344	0.0293068		0.013626	0.0174414	0.0131514
AP_Breast_Colon.arff	125	0.2664	0.315608	0.234772		0.6496	0.760947	0.602004		0.4928	0.595259	0.468483		0.0768	0.0876911	0.0633743			0.0291376	0.0297078	0.0265127		0.0302049	0.0304216	0.0276044		0.0320832	0.0317604	0.024803		0.0223084	0.0274977	0.0224611
AP_Breast_Colon.arff	137.5	0.29	0.329414	0.240903		0.676	0.781244	0.61116		0.512	0.624954	0.497465		0.0888	0.105085	0.0753426			0.0332916	0.0339668	0.0225639		0.0387298	0.0366844	0.0377974		0.031225	0.0278063	0.0273264		0.019	0.0265027	0.0223218
AP_Breast_Colon.arff	150	0.2624	0.298345	0.21676		0.6884	0.798535	0.623865		0.4532	0.524253	0.389949		0.0456	0.0518891	0.036404			0.0329495	0.0308047	0.0236844		0.0211503	0.0202089	0.0252934		0.0355575	0.0474142	0.0442985		0.0206317	0.0243726	0.0198944
AP_Breast_Colon.arff	162.5	0.3752	0.463303	0.35238		0.6764	0.784764	0.626139		0.4596	0.547905	0.41764		0.084	0.0962139	0.0676911			0.024173	0.0257588	0.0251716		0.0269072	0.0232857	0.0253758		0.0357631	0.0384725	0.0363255		0.0180278	0.0218033	0.0207819
AP_Breast_Colon.arff	175	0.3636	0.437267	0.331501		0.7036	0.792883	0.619786		0.4672	0.558436	0.432143		0.0652	0.0754614	0.0544792			0.0287054	0.0343968	0.0270821		0.0330252	0.0347891	0.0351394		0.0368013	0.0442745	0.0428398		0.027556	0.0314551	0.0221888
AP_Breast_Colon.arff	187.5	0.3508	0.41745	0.318994		0.7004	0.796986	0.625141		0.3736	0.427838	0.310028		0.0536	0.0637267	0.0436594			0.0213931	0.024892	0.0220563		0.0470354	0.0374083	0.0376284		0.0620403	0.0780427	0.0658058		0.0211896	0.0273527	0.0210187
AP_Breast_Colon.arff	200	0.374	0.442539	0.330962		0.7128	0.80335	0.620855		0.4204	0.505251	0.394004		0.0408	0.0485901	0.035295			0.031225	0.0322616	0.0274301		0.0268514	0.0284154	0.0389499		0.0427668	0.0550571	0.0450111		0.0177764	0.0222715	0.0166185
AP_Breast_Colon.arff	212.5	0.3992	0.474261	0.355279		0.744	0.842051	0.671446		0.5876	0.66865	0.503754		0.0796	0.096	0.0700277			0.0313475	0.0300326	0.0266349		0.0269258	0.0250308	0.0344704		0.0371124	0.0396222	0.0308004		0.024235	0.0317685	0.0253025
AP_Breast_Colon.arff	225	0.3708	0.43981	0.332301		0.7536	0.861529	0.693893		0.4028	0.452547	0.331287		0.0552	0.0647327	0.046305			0.0316122	0.0328892	0.0312595		0.022151	0.0186111	0.0260658		0.0564594	0.0733546	0.0676203		0.0220076	0.0256457	0.0194144
AP_Breast_Colon.arff	237.5	0.3924	0.446063	0.325861		0.7484	0.830792	0.656507		0.4324	0.501141	0.375129		0.0452	0.0532317	0.0370376			0.0271232	0.0283557	0.0261451		0.0271846	0.026154	0.0327796		0.0528583	0.0624257	0.0538077		0.0198158	0.0248901	0.0189102
AP_Breast_Colon.arff	250	0.4352	0.521679	0.394693		0.7512	0.861715	0.70198		0.452	0.519703	0.39322		0.054	0.0622535	0.0427089			0.0389572	0.035961	0.0329035		0.0268204	0.0185197	0.0269744		0.0520416	0.064704	0.0551854		0.0191485	0.0212588	0.0157429
AP_Breast_Colon.arff	262.5	0.4076	0.482887	0.369489		0.7976	0.8804	0.684721		0.5464	0.645473	0.508119		0.0768	0.091703	0.0652673			0.0367741	0.0345711	0.0284787		0.0220378	0.0183759	0.026546		0.0273679	0.0229531	0.0214055		0.0228619	0.0295711	0.0244265
AP_Breast_Colon.arff	275	0.4244	0.487034	0.36076		0.7472	0.850285	0.694978		0.5164	0.613846	0.479295		0.0624	0.0763644	0.0564356			0.0350095	0.0350391	0.0352067		0.0307571	0.0228982	0.0289046		0.0433859	0.0439871	0.0357521		0.0231445	0.0266333	0.0207327
AP_Breast_Colon.arff	287.5	0.4204	0.510396	0.387057		0.78	0.873093	0.703572		0.444	0.510713	0.381703		0.0484	0.0599485	0.0441505			0.0282076	0.0279864	0.0281423		0.0234521	0.0167117	0.0272419		0.0508265	0.0648363	0.0544807		0.0143411	0.0208461	0.018418
AP_Breast_Colon.arff	300	0.4812	0.571612	0.437996		0.7692	0.870305	0.706067		0.4736	0.543517	0.410162		0.0476	0.0550139	0.0381782			0.0389786	0.0350302	0.0293754		0.0308113	0.0240663	0.0312196		0.0497393	0.0517848	0.047569		0.0208726	0.0278343	0.0230345
AP_Breast_Colon.arff	312.5	0.4736	0.554356	0.416713		0.778	0.876863	0.711564		0.4468	0.5188	0.396428		0.0496	0.0595248	0.0435485			0.0308058	0.0310684	0.0302228		0.0246644	0.0223772	0.0324542		0.0319792	0.0339342	0.0323525		0.0156738	0.0196414	0.0187437

## Sheet: Breast_Kidney
		Stability																	Standard Deviation of Stability (Meta-stability)
		Signal-to-noise Filter				InfoGain Filter				RelifF Filter				SVM-RFE Filter					Signal-to-noise Filter				Info Gain Filter				RelifF Filter				SVM-RFE Filter
Dataset	NumSamples	Overlap	Overlap 2	Spearman		Overlap	Overlap 2	Spearman		Overlap	Overlap 2	Spearman		Overlap	Overlap 2	Spearman			Overlap	Overlap 2	Spearman		Overlap	Overlap 2	Spearman		Overlap	Overlap 2	Spearman		Overlap	Overlap 2	Spearman
AP_Breast_Colon.arff	50
AP_Breast_Colon.arff	75
AP_Breast_Colon.arff	100
AP_Breast_Colon.arff	125
AP_Breast_Colon.arff	150
AP_Breast_Colon.arff	175
AP_Breast_Colon.arff	200
AP_Breast_Colon.arff	225
AP_Breast_Colon.arff	250
AP_Breast_Colon.arff	275
AP_Breast_Colon.arff	300
AP_Breast_Colon.arff	325
AP_Breast_Colon.arff	350
AP_Breast_Colon.arff	375
AP_Breast_Colon.arff	400
AP_Breast_Colon.arff	425
AP_Breast_Colon.arff	450
AP_Breast_Colon.arff	475
AP_Breast_Colon.arff	500
AP_Breast_Colon.arff	525
AP_Breast_Colon.arff	550
AP_Breast_Colon.arff	575
AP_Breast_Colon.arff	600

## Sheet: Colon_Kidney
		Stability																	Standard Deviation of Stability (Meta-stability)
		Signal-to-noise Filter				InfoGain Filter				RelifF Filter				SVM-RFE Filter					Signal-to-noise Filter				Info Gain Filter				RelifF Filter				SVM-RFE Filter
Dataset	NumSamples	Overlap	Overlap 2	Spearman		Overlap	Overlap 2	Spearman		Overlap	Overlap 2	Spearman		Overlap	Overlap 2	Spearman			Overlap	Overlap 2	Spearman		Overlap	Overlap 2	Spearman		Overlap	Overlap 2	Spearman		Overlap	Overlap 2	Spearman
AP_Breast_Colon.arff	50
AP_Breast_Colon.arff	75
AP_Breast_Colon.arff	100
AP_Breast_Colon.arff	125
AP_Breast_Colon.arff	150
AP_Breast_Colon.arff	175
AP_Breast_Colon.arff	200
AP_Breast_Colon.arff	225
AP_Breast_Colon.arff	250
AP_Breast_Colon.arff	275
AP_Breast_Colon.arff	300
AP_Breast_Colon.arff	325
AP_Breast_Colon.arff	350
AP_Breast_Colon.arff	375
AP_Breast_Colon.arff	400
AP_Breast_Colon.arff	425
AP_Breast_Colon.arff	450
AP_Breast_Colon.arff	475
AP_Breast_Colon.arff	500
AP_Breast_Colon.arff	525

## Sheet: Breast_Ovary
		Stability																	Standard Deviation of Stability (Meta-stability)
		Signal-to-noise Filter				InfoGain Filter				RelifF Filter				SVM-RFE Filter					Signal-to-noise Filter				Info Gain Filter				RelifF Filter				SVM-RFE Filter
Dataset	NumSamples	Overlap	Overlap 2	Spearman		Overlap	Overlap 2	Spearman		Overlap	Overlap 2	Spearman		Overlap	Overlap 2	Spearman			Overlap	Overlap 2	Spearman		Overlap	Overlap 2	Spearman		Overlap	Overlap 2	Spearman		Overlap	Overlap 2	Spearman
AP_Breast_Colon.arff	50
AP_Breast_Colon.arff	75
AP_Breast_Colon.arff	100
AP_Breast_Colon.arff	125
AP_Breast_Colon.arff	150
AP_Breast_Colon.arff	175
AP_Breast_Colon.arff	200
AP_Breast_Colon.arff	225
AP_Breast_Colon.arff	250
AP_Breast_Colon.arff	275
AP_Breast_Colon.arff	300
AP_Breast_Colon.arff	325
AP_Breast_Colon.arff	350
AP_Breast_Colon.arff	375
AP_Breast_Colon.arff	400
AP_Breast_Colon.arff	425
AP_Breast_Colon.arff	450
AP_Breast_Colon.arff	475
AP_Breast_Colon.arff	500
AP_Breast_Colon.arff	525
