# Supplementary material for: Stability of Ranked Gene Lists in Large Microarray Analysis Studies
Source: Hindawi journal article supplement (doi:10.1155/2010/616358), 2010-01-01
Supplement: f2 [file 616358.f2.xls]

## Sheet: Breast_Colon
		Accuracy (ACC)					Area Under Curve (AUC)					ACC Standard Deviation					AUC Standard Deviation
	NumSamples	kNN (InfoGain)	SVM (InfoGain)	kNN (SVM-RFE)	SVM (SVM-RFE)		kNN (InfoGain)	SVM (InfoGain)	kNN (SVM-RFE)	SVM (SVM-RFE)		kNN (InfoGain)	SVM (InfoGain)	kNN (SVM-RFE)	SVM (SVM-RFE)		kNN (InfoGain)	SVM (InfoGain)	kNN (SVM-RFE)	SVM (SVM-RFE)
AP_Breast_Colon.arff	50	0.952	0.952	0.956	0.956		0.959365	0.945595	0.981342	0.952513		0.0303315	0.0303315	0.0260768	0.0260768		0.0317679	0.0396933	0.0156854	0.029654
AP_Breast_Colon.arff	75	0.944	0.954667	0.936	0.946667		0.965731	0.95353	0.968648	0.945337		0.0318329	0.0292119	0.028906	0.0365148		0.0254747	0.0302176	0.0343625	0.0368969
AP_Breast_Colon.arff	100	0.948	0.944	0.944	0.942		0.965381	0.941775	0.961831	0.940776		0.0238747	0.0151658	0.0181659	0.0130384		0.0203044	0.0148786	0.0180456	0.0135581
AP_Breast_Colon.arff	125	0.9408	0.952	0.9472	0.952		0.955283	0.947217	0.964011	0.948365		0.00715542	0.0149666	0.0121326	0.008		0.0119785	0.0168088	0.00926717	0.00883149
AP_Breast_Colon.arff	150	0.956	0.964	0.956	0.964		0.976397	0.963428	0.980129	0.963097		0.0138243	0.0129957	0.0129957	0.0138243		0.0103369	0.0128801	0.00971516	0.0131382
AP_Breast_Colon.arff	175	0.955429	0.957714	0.956571	0.949714		0.969859	0.956357	0.979074	0.948965		0.00847566	0.00866614	0.0154391	0.0173323		0.0156003	0.0098292	0.0107415	0.017782
AP_Breast_Colon.arff	200	0.959	0.964	0.961	0.963		0.971065	0.962226	0.978885	0.961505		0.0065192	0.00961769	0.0119373	0.0195576		0.00309682	0.0103493	0.0191339	0.0200066
AP_Breast_Colon.arff	225	0.954667	0.957333	0.955556	0.959111		0.974425	0.955575	0.971269	0.958266		0.00371849	0.0107036	0.0113312	0.0138421		0.00728848	0.0119847	0.01656	0.0140415
AP_Breast_Colon.arff	250	0.9592	0.9616	0.9512	0.9592		0.976725	0.958301	0.968058	0.957711		0.0103537	0.00829458	0.0175271	0.0148054		0.00943856	0.00812693	0.0207436	0.013725
AP_Breast_Colon.arff	275	0.957091	0.957091	0.952727	0.954182		0.974921	0.95598	0.973341	0.953522		0.00597516	0.0144084	0.00514259	0.00982491		0.00722132	0.0145595	0.00970046	0.0105122
AP_Breast_Colon.arff	300	0.962	0.960667	0.958	0.962		0.981798	0.957076	0.978032	0.961013		0.00505525	0.0101105	0.00869227	0.00988826		0.00377377	0.0107586	0.0117342	0.00934287
AP_Breast_Colon.arff	325	0.960615	0.964923	0.960615	0.964308		0.98187	0.962871	0.978684	0.962907		0.0100649	0.00412813	0.00825625	0.0120355		0.00448053	0.00341111	0.00971942	0.0124149
AP_Breast_Colon.arff	350	0.961143	0.965714	0.959429	0.958286		0.975961	0.963782	0.972899	0.957217		0.00745052	0.00534522	0.00934596	0.00519026		0.00668548	0.00721356	0.00961108	0.00603611
AP_Breast_Colon.arff	375	0.9616	0.964267	0.959467	0.963733		0.97742	0.962876	0.972987	0.963049		0.00935236	0.00357771	0.00292119	0.00954056		0.00409849	0.00336161	0.00611054	0.00948239
AP_Breast_Colon.arff	400	0.962	0.963	0.958	0.962		0.983355	0.961526	0.973296	0.961365		0.00541987	0.00512348	0.00778621	0.00817771		0.00256707	0.00562745	0.00633234	0.00755803
AP_Breast_Colon.arff	425	0.963765	0.963294	0.965647	0.960941		0.981423	0.960952	0.97748	0.959982		0.00487916	0.00515504	0.0031568	0.00677876		0.00414833	0.00533678	0.00671664	0.00672192
AP_Breast_Colon.arff	450	0.964	0.959556	0.959111	0.964444		0.980171	0.957298	0.977218	0.96364		0.00791935	0.0109319	0.00963533	0.00702728		0.00479787	0.0116245	0.00454884	0.00737804
AP_Breast_Colon.arff	475	0.966316	0.965474	0.962526	0.966316		0.984803	0.963489	0.975728	0.965371		0.00536739	0.00436557	0.0068865	0.00682183		0.00277383	0.00470677	0.00647801	0.00672117
AP_Breast_Colon.arff	500	0.9648	0.9656	0.9624	0.9612		0.982781	0.963138	0.979994	0.96022		0.00460435	0.00167332	0.00384708	0.00923038		0.00551795	0.0021229	0.00544516	0.00900151
AP_Breast_Colon.arff	525	0.968762	0.967238	0.963429	0.962286		0.985185	0.965385	0.976326	0.9615		0.0039498	0.00159364	0.00545441	0.00312984		0.0020211	0.00177955	0.00367041	0.00299957
AP_Breast_Colon.arff	550	0.963273	0.964727	0.959636	0.956727		0.97896	0.962464	0.972827	0.955513		0.00237062	0.00554471	0.00349734	0.00837154		0.00514594	0.00633133	0.00305592	0.00845108
AP_Breast_Colon.arff	575	0.965217	0.965217	0.958261	0.958261		0.982705	0.963286	0.972955	0.957044		0.00301226	0.00122975	0.00347826	0.00274981		0.00261017	0.0012818	0.00849145	0.00326557
AP_Breast_Colon.arff	600	0.962667	0.965667	0.959333	0.960667		0.979303	0.96378	0.977831	0.959941		0.00365148	0.00345607	0.00302765	0.00324893		0.00424544	0.00333179	0.00359385	0.00326153
AP_Breast_Colon.arff	625	0.96256	0.96544	0.96096	0.96544		0.984007	0.963653	0.978515	0.964863		0.00267731	0.00143108	0.00537848	0.00331783		0.00232482	0.00162192	0.00133989	0.00317891
		Friedman Test					Friedman Test
		Ranks					Ranks
			Mean Rank					Mean Rank
		kNN_IG	2.52083				kNN_IG	3.75
		kNN_SVMRFE	3.3125				kNN_SVMRFE	1.625
		SVM_IG	1.72917				SVM_IG	3.25
		SVM_SVMRFE	2.4375				SVM_SVMRFE	1.375
		Test Statistics					Test Statistics
		N	24				N	24
		Chi-Square	19.3333				Chi-Square	59.85
		df	3				df	3
		Asymp. Sig.	0.000233264				Asymp. Sig.	6.32838e-13
		Wilcoxon Signed Ranks Test					Wilcoxon Signed Ranks Test

## Sheet: Breast_Kidney
		Accuracy (ACC)					Area Under Curve (AUC)					ACC Standard Deviation					AUC Standard Deviation
	NumSamples	kNN (InfoGain)	SVM (InfoGain)	kNN (SVM-RFE)	SVM (SVM-RFE)		kNN (InfoGain)	SVM (InfoGain)	kNN (SVM-RFE)	SVM (SVM-RFE)		kNN (InfoGain)	SVM (InfoGain)	kNN (SVM-RFE)	SVM (SVM-RFE)		kNN (InfoGain)	SVM (InfoGain)	kNN (SVM-RFE)	SVM (SVM-RFE)
AP_Breast_Kidney.arff	50	0.968	0.976	0.984	0.988		0.979716	0.97519	0.987906	0.986774		0.0334664	0.0219089	0.0167332	0.0178885		0.0195722	0.0226842	0.0165761	0.0195301
AP_Breast_Kidney.arff	75	0.965333	0.970667	0.96	0.968		0.986105	0.968669	0.980112	0.96455		0.0178885	0.0219089	0.023094	0.0152023		0.0111697	0.0217829	0.0150195	0.0171758
AP_Breast_Kidney.arff	100	0.956	0.962	0.962	0.96		0.977502	0.958785	0.981705	0.958664		0.0167332	0.0109545	0.0164317	0.0187083		0.0168921	0.0115854	0.0170996	0.0175813
AP_Breast_Kidney.arff	125	0.9392	0.952	0.9488	0.9488		0.968352	0.946043	0.978345	0.94563		0.0133866	0.00565685	0.00715542	0.0208614		0.00538012	0.00760947	0.0129886	0.0204746
AP_Breast_Kidney.arff	150	0.965333	0.968	0.957333	0.956		0.971839	0.967443	0.964242	0.954501		0.00557773	0.00988826	0.0160555	0.0153478		0.0151179	0.00977887	0.0203255	0.0144056
AP_Breast_Kidney.arff	175	0.96	0.965714	0.962286	0.964571		0.971713	0.962977	0.9799	0.962615		0.0145686	0.0145686	0.0131553	0.00847566		0.0182862	0.0157282	0.00800148	0.00906967
AP_Breast_Kidney.arff	200	0.961	0.972	0.974	0.975		0.974278	0.971386	0.984629	0.974316		0.0155724	0.0120416	0.0167332	0.0169558		0.0176901	0.0124549	0.013106	0.0179548
AP_Breast_Kidney.arff	225	0.972444	0.974222	0.975111	0.975111		0.982023	0.972106	0.986192	0.97354		0.00579485	0.00579485	0.00674033	0.00866382		0.00217209	0.00682659	0.00470159	0.0100649
AP_Breast_Kidney.arff	250	0.964	0.9656	0.9632	0.9672		0.974815	0.963731	0.978224	0.96518		0.00565685	0.00829458	0.0133866	0.00867179		0.00636761	0.00820208	0.0099953	0.00990158
AP_Breast_Kidney.arff	275	0.967273	0.970182	0.973091	0.965818		0.980731	0.968506	0.985709	0.964665		0.0057496	0.00788345	0.0060848	0.0116704		0.00906375	0.00786124	0.00419387	0.010895
AP_Breast_Kidney.arff	300	0.968667	0.966667	0.967333	0.968		0.98194	0.964849	0.978903	0.967737		0.0126051	0.00816497	0.0111555	0.00767391		0.0107433	0.00805911	0.0109546	0.0072532
AP_Breast_Kidney.arff	325	0.966154	0.967385	0.966154	0.966154		0.979897	0.965176	0.981591	0.964649		0.00688021	0.00886453	0.0115128	0.00753689		0.00676099	0.0104386	0.0080984	0.00730468
AP_Breast_Kidney.arff	350	0.962857	0.968571	0.964	0.966857		0.978559	0.967036	0.976011	0.965787		0.00534522	0.00451754	0.00688091	0.00960442		0.00866961	0.00451375	0.00824717	0.0101054
AP_Breast_Kidney.arff	375	0.9648	0.968533	0.962133	0.960533		0.974528	0.966488	0.96909	0.959376		0.00512944	0.00872289	0.00395531	0.00395531		0.00605267	0.00969793	0.00616268	0.00370832
AP_Breast_Kidney.arff	400	0.9715	0.9755	0.9725	0.9665		0.984569	0.973383	0.982643	0.965869		0.00675463	0.00570088	0.00612372	0.010247		0.00443388	0.0056963	0.00744258	0.0100834
AP_Breast_Kidney.arff	425	0.968941	0.972706	0.969882	0.970353		0.98203	0.970947	0.981432	0.969233		0.0067378	0.00356841	0.0067378	0.0063573		0.00378213	0.00414167	0.00446731	0.00630746
AP_Breast_Kidney.arff	450	0.964889	0.972889	0.967556	0.966667		0.985599	0.971036	0.982303	0.964901		0.00596285	0.00185924	0.00557773	0.00929622		0.0042669	0.00186897	0.00594353	0.00874813
AP_Breast_Kidney.arff	475	0.968421	0.973474	0.969684	0.961684		0.98165	0.971581	0.977961	0.96049		0.00536739	0.00436557	0.00240037	0.00404955		0.00349656	0.00420435	0.00345325	0.00417286
AP_Breast_Kidney.arff	500	0.9664	0.9744	0.9732	0.9664		0.976817	0.972667	0.979745	0.965881		0.00477493	0.00296648	0.00481664	0.00260768		0.0015288	0.00307563	0.00364067	0.00301426
AP_Breast_Kidney.arff	525	0.971048	0.975619	0.973714	0.970286		0.978357	0.973407	0.980839	0.969264		0.00340734	0.00454756	0.00248351	0.00371306		0.0049143	0.00482179	0.00285309	0.00382083
AP_Breast_Kidney.arff	550	0.971636	0.976	0.973455	0.968364		0.979696	0.974095	0.975421	0.967429		0.00377026	0.00298758	0.0045636	0.00711186		0.00238522	0.00329883	0.00644758	0.00727891
AP_Breast_Kidney.arff	575	0.969043	0.976	0.971478	0.972522		0.977848	0.974001	0.977891	0.971787		0.00226755	0.000777763	0.00291012	0.00555434		0.00327432	0.000917595	0.00284425	0.00623654
AP_Breast_Kidney.arff	600	0.967667	0.974667	0.971333	0.966333		0.981266	0.972841	0.976326	0.965717		0.00278887	0.00217307	0.00361325	0.00462481		0.00200603	0.00205082	0.00502582	0.00430537
		Friedman Test					Friedman Test
		Ranks					Ranks
			Mean Rank					Mean Rank
		kNN_IG	1.71739				kNN_IG	3.3913
		kNN_SVMRFE	3.5				kNN_SVMRFE	1.82609
		SVM_IG	2.54348				SVM_IG	3.47826
		SVM_SVMRFE	2.23913				SVM_SVMRFE	1.30435
		Test Statistics					Test Statistics
		N	23				N	23
		Chi-Square	24.0541				Chi-Square	50.1652
		df	3				df	3
		Asymp. Sig.	2.43392e-05				Asymp. Sig.	7.36741e-11
		Wilcoxon Signed Ranks Test					Wilcoxon Signed Ranks Test

## Sheet: Breast_Ovary
		Accuracy (ACC)					Area Under Curve (AUC)					ACC Standard Deviation					AUC Standard Deviation
	NumSamples	kNN (InfoGain)	SVM (InfoGain)	kNN (SVM-RFE)	SVM (SVM-RFE)		kNN (InfoGain)	SVM (InfoGain)	kNN (SVM-RFE)	SVM (SVM-RFE)		kNN (InfoGain)	SVM (InfoGain)	kNN (SVM-RFE)	SVM (SVM-RFE)		kNN (InfoGain)	SVM (InfoGain)	kNN (SVM-RFE)	SVM (SVM-RFE)
AP_Breast_Ovary.arff	50	0.948	0.956	0.952	0.968		0.965821	0.949851	0.984254	0.963985		0.0228035	0.0167332	0.0109545	0.0178885		0.0177166	0.0171296	0.0100801	0.0214594
AP_Breast_Ovary.arff	75	0.96	0.96	0.941333	0.965333		0.982077	0.958618	0.97609	0.962371		0.0312694	0.0163299	0.038413	0.0152023		0.0169378	0.0185328	0.0193376	0.0174045
AP_Breast_Ovary.arff	100	0.964	0.964	0.934	0.95		0.988386	0.959454	0.969316	0.946343		0.0151658	0.0167332	0.0230217	0		0.00606611	0.0228588	0.0103278	0.00336535
AP_Breast_Ovary.arff	125	0.9648	0.968	0.9568	0.9712		0.969665	0.96513	0.987455	0.968517		0.0133866	0.016	0.0262907	0.0175271		0.0240821	0.0189117	0.00800665	0.0202411
AP_Breast_Ovary.arff	150	0.957333	0.966667	0.954667	0.964		0.97539	0.964572	0.977052	0.963473		0.0219089	0.0149071	0.0172562	0.0173845		0.0157957	0.0155979	0.00496337	0.0166922
AP_Breast_Ovary.arff	175	0.965714	0.971429	0.950857	0.96		0.974218	0.968934	0.971802	0.955746		0.0134012	0.0193781	0.014901	0.0106904		0.015704	0.0257199	0.0197366	0.0140077
AP_Breast_Ovary.arff	200	0.964	0.968	0.958	0.965		0.974472	0.964694	0.983547	0.962785		0.0191703	0.015248	0.0171756	0.00935414		0.0140132	0.0178791	0.00690803	0.0106353
AP_Breast_Ovary.arff	225	0.958222	0.96	0.958222	0.963556		0.978168	0.957042	0.980851	0.961922		0.0173845	0.0129577	0.0209879	0.0207037		0.0113609	0.0142476	0.0178	0.0222953
AP_Breast_Ovary.arff	250	0.9592	0.964	0.9608	0.9624		0.98429	0.96083	0.978438	0.958097		0.00521536	0.00748331	0.00715542	0.0045607		0.00680548	0.00813703	0.00639042	0.0046996
AP_Breast_Ovary.arff	275	0.971636	0.966545	0.962909	0.966545		0.979388	0.96294	0.978349	0.96465		0.00162623	0.00650493	0.00829218	0.00941249		0.0105221	0.00821543	0.0127203	0.00873537
AP_Breast_Ovary.arff	300	0.975333	0.976	0.968	0.968667		0.978661	0.973298	0.984983	0.965661		0.00691215	0.0106458	0.0130384	0.0121564		0.00954064	0.0116969	0.00181013	0.0126687
AP_Breast_Ovary.arff	325	0.969846	0.972308	0.962462	0.968		0.984407	0.970259	0.979398	0.966433		0.012574	0.0141002	0.0141672	0.0145301		0.00990449	0.0154279	0.00835142	0.01616
AP_Breast_Ovary.arff	350	0.958286	0.964571	0.954857	0.964		0.96777	0.962261	0.978586	0.960801		0.00688091	0.0059247	0.00619414	0.0133401		0.00681674	0.00687417	0.00819244	0.0146388
AP_Breast_Ovary.arff	375	0.9712	0.9728	0.957867	0.963733		0.975554	0.969119	0.968991	0.960874		0.00872289	0.0073997	0.0110594	0.00720494		0.0130647	0.00778783	0.00743379	0.00602028
AP_Breast_Ovary.arff	400	0.9655	0.972	0.9605	0.9685		0.977123	0.969376	0.980043	0.966347		0.00273861	0.0116458	0.00647109	0.00720243		0.00636693	0.011967	0.00825569	0.00916691
AP_Breast_Ovary.arff	425	0.964235	0.965647	0.959529	0.969412		0.976199	0.961538	0.978056	0.965906		0.00989915	0.00677876	0.00196861	0.00644379		0.0102287	0.00788774	0.00270302	0.00768087
AP_Breast_Ovary.arff	450	0.966222	0.967111	0.96	0.963111		0.974034	0.96454	0.979794	0.959556		0.00185924	0.00365148	0.00737028	0.00659218		0.00438736	0.00343269	0.00413279	0.00804784
AP_Breast_Ovary.arff	475	0.963368	0.970947	0.962526	0.963789		0.974948	0.968578	0.978577	0.961265		0.00436557	0.00793324	0.00544934	0.0105683		0.00645941	0.00907973	0.0044408	0.0108369
AP_Breast_Ovary.arff	500	0.9676	0.9696	0.9584	0.968		0.976343	0.966927	0.979044	0.965416		0.00572713	0.00572713	0.00517687	0.00316228		0.00791519	0.00609583	0.00494205	0.00419964
AP_Breast_Ovary.arff	525	0.969905	0.969143	0.959238	0.963429		0.9764	0.966306	0.979906	0.960721		0.00454756	0.00312984	0.00318728	0.00593235		0.00708794	0.00440648	0.00228838	0.00662356
		Friedman Test					Friedman Test
		Ranks					Ranks
			Mean Rank					Mean Rank
		kNN_IG	2.425				kNN_IG	3.35
		kNN_SVMRFE	3.575				kNN_SVMRFE	1.75
		SVM_IG	1.125				SVM_IG	3.6
		SVM_SVMRFE	2.875				SVM_SVMRFE	1.3
		Test Statistics					Test Statistics
		N	20				N	20
		Chi-Square	39.0918				Chi-Square	47.22
		df	3				df	3
		Asymp. Sig.	1.65963e-08				Asymp. Sig.	3.12055e-10
		Wilcoxon Signed Ranks Test					Wilcoxon Signed Ranks Test

## Sheet: Colon_Kidney
		Accuracy (ACC)					Area Under Curve (AUC)					ACC Standard Deviation					AUC Standard Deviation
	NumSamples	kNN (InfoGain)	SVM (InfoGain)	kNN (SVM-RFE)	SVM (SVM-RFE)		kNN (InfoGain)	SVM (InfoGain)	kNN (SVM-RFE)	SVM (SVM-RFE)		kNN (InfoGain)	SVM (InfoGain)	kNN (SVM-RFE)	SVM (SVM-RFE)		kNN (InfoGain)	SVM (InfoGain)	kNN (SVM-RFE)	SVM (SVM-RFE)
AP_Colon_Kidney.arff	50	0.924	0.94	0.94	0.932		0.955733	0.939438	0.990334	0.932156		0.0219089	0.0244949	0.0282843	0.0303315		0.0306684	0.0239027	0.00691224	0.0307112
AP_Colon_Kidney.arff	75	0.965333	0.962667	0.965333	0.965333		0.979274	0.960524	0.995081	0.9638		0.00730297	0.0111555	0.020221	0.020221		0.0168939	0.0143912	0.00275037	0.0198879
AP_Colon_Kidney.arff	100	0.968	0.966	0.974	0.968		0.980366	0.965628	0.997992	0.967251		0.0109545	0.0167332	0.00894427	0.0083666		0.01168	0.0162744	0.00199959	0.00874209
AP_Colon_Kidney.arff	125	0.9616	0.9632	0.9648	0.9648		0.975607	0.96275	0.99539	0.964433		0.0199198	0.0216148	0.0208614	0.0208614		0.0110444	0.0218406	0.00551865	0.0207296
AP_Colon_Kidney.arff	150	0.965333	0.968	0.976	0.977333		0.980065	0.966574	0.994811	0.977214		0.0165999	0.0172562	0.0138243	0.0160555		0.0189317	0.0175447	0.0069952	0.0162888
AP_Colon_Kidney.arff	175	0.984	0.980571	0.982857	0.974857		0.990632	0.979768	0.998425	0.974572		0.0136427	0.0131553	0.00903508	0.00651529		0.00772794	0.0145081	0.0012197	0.00687932
AP_Colon_Kidney.arff	200	0.982	0.979	0.982	0.976		0.992247	0.979109	0.99781	0.975913		0.0083666	0.00894427	0.0135093	0.0124499		0.00759392	0.00854102	0.00196724	0.0128416
AP_Colon_Kidney.arff	225	0.973333	0.970667	0.971556	0.973333		0.981901	0.970692	0.996093	0.97339		0.00942809	0.00243432	0.00743698	0.00628539		0.00987925	0.00228359	0.00492557	0.00651592
AP_Colon_Kidney.arff	250	0.9784	0.9752	0.9808	0.9784		0.987175	0.975317	0.99727	0.978266		0.00669328	0.00593296	0.00334664	0.00726636		0.00568145	0.00602054	0.00217654	0.00711986
AP_Colon_Kidney.arff	275	0.968	0.974545	0.974545	0.970182		0.979256	0.97475	0.996956	0.970143		0.00941249	0.00852803	0.00771389	0.00650493		0.00905146	0.00813929	0.00314544	0.00633243
AP_Colon_Kidney.arff	300	0.974667	0.973333	0.98	0.978		0.987305	0.972655	0.996963	0.977643		0.0060553	0.00235702	0.00527046	0.00649786		0.00696591	0.00287084	0.00305066	0.0069506
AP_Colon_Kidney.arff	325	0.972923	0.968	0.978462	0.977846		0.978605	0.96789	0.998122	0.977563		0.00257434	0.00912763	0.00217571	0.00591858		0.00699137	0.00907437	0.000516711	0.00632617
AP_Colon_Kidney.arff	350	0.974286	0.972571	0.98	0.976		0.976411	0.972565	0.996751	0.975869		0.00670059	0.00771957	0.00349927	0.0059247		0.0101237	0.00774531	0.00272171	0.00598062
AP_Colon_Kidney.arff	375	0.977067	0.975467	0.981333	0.978133		0.983687	0.975672	0.996193	0.978345		0.00896413	0.00830529	0.00596285	0.00763617		0.0041531	0.00834451	0.0036326	0.00748676
AP_Colon_Kidney.arff	400	0.9725	0.9765	0.976	0.9785		0.985582	0.976482	0.993651	0.978556		0.00707107	0.0041833	0.00285044	0.00698212		0.00451016	0.00408213	0.00437564	0.00711673
AP_Colon_Kidney.arff	425	0.976471	0.976471	0.980235	0.980706		0.985245	0.97649	0.994268	0.980612		0.00644379	0.00685994	0.00268277	0.00386628		0.00765167	0.0072136	0.0016557	0.00379407
AP_Colon_Kidney.arff	450	0.977778	0.973778	0.982222	0.984		0.984147	0.973854	0.996824	0.983971		0.00444444	0.00674033	0.00521157	0.00506745		0.00961344	0.0068064	0.00251048	0.00513425
AP_Colon_Kidney.arff	475	0.976421	0.973053	0.980632	0.980211		0.986765	0.972985	0.993561	0.980083		0.00620963	0.0065568	0.00735337	0.00507015		0.00811265	0.0067289	0.00576354	0.00509195
AP_Colon_Kidney.arff	500	0.9784	0.9752	0.98	0.9784		0.987804	0.975326	0.995734	0.978461		0.0043359	0.0054037	0.002	0.00296648		0.00136638	0.00541791	0.00323465	0.00295043
AP_Colon_Kidney.arff	525	0.976762	0.972571	0.982476	0.980571		0.984151	0.972545	0.994826	0.980613		0.00159364	0.00288871	0.00248351	0.00159364		0.00668504	0.00289044	0.00427396	0.00159789
		Friedman Test					Friedman Test
		Ranks					Ranks
			Mean Rank					Mean Rank
		kNN_IG	2.1				kNN_IG	3
		kNN_SVMRFE	1.575				kNN_SVMRFE	1.2
		SVM_IG	3.45				SVM_IG	4
		SVM_SVMRFE	2.875				SVM_SVMRFE	1.8
		Test Statistics					Test Statistics
		N	20				N	20
		Chi-Square	26.4225				Chi-Square	56.16
		df	3				df	3
		Asymp. Sig.	7.77953e-06				Asymp. Sig.	3.8833e-12
		Wilcoxon Signed Ranks Test					Wilcoxon Signed Ranks Test
