# Supplementary material for: Stability of Ranked Gene Lists in Large Microarray Analysis Studies
Source: Hindawi journal article supplement (doi:10.1155/2010/616358), 2010-01-01
Supplement: f3 [file 616358.f3.xls]

## Sheet: Breast_Colon
		Stability																	Standard Deviation of Stability (Meta-stability)
		Signal-to-noise Filter				InfoGain Filter				RelifF Filter				SVM-RFE Filter					Signal-to-noise Filter				Info Gain Filter				RelifF Filter				SVM-RFE Filter
Dataset	NumSamples	Overlap	W. Overlap	Spearman		Overlap	W. Overlap	Spearman		Overlap	W. Overlap	Spearman		Overlap	W. Overlap	Spearman			Overlap	W. Overlap	Spearman		Overlap	W. Overlap	Spearman		Overlap	W. Overlap	Spearman		Overlap	W. Overlap	Spearman
AP_Breast_Colon.arff	50	0.245067	0.286523	0.214463		0.330533	0.378468	0.282175		0.351644	0.423579	0.329303		0.233289	0.272099	0.200375			0.0837133	0.102521	0.0831393		0.0826195	0.0940999	0.0739428		0.10209	0.117639	0.0992478		0.0657049	0.0784176	0.0617962
AP_Breast_Colon.arff	75	0.356711	0.422583	0.322765		0.446756	0.507586	0.380569		0.361289	0.430121	0.331469		0.224711	0.259556	0.191752			0.0836217	0.100408	0.0823644		0.0834174	0.0930322	0.0794854		0.100439	0.119238	0.098476		0.0640214	0.0738483	0.0564339
AP_Breast_Colon.arff	100	0.383244	0.44928	0.340576		0.543378	0.614004	0.460649		0.410356	0.487122	0.38056		0.201467	0.22925	0.166492			0.0819962	0.101853	0.0864277		0.0645272	0.073896	0.0684697		0.105402	0.124979	0.105426		0.0693046	0.0824598	0.0662463
AP_Breast_Colon.arff	125	0.41	0.487212	0.374646		0.583156	0.655163	0.49281		0.469911	0.563336	0.449322		0.222533	0.259652	0.192578			0.0635425	0.0772821	0.0674717		0.0552268	0.060416	0.0558774		0.0975654	0.109083	0.0926443		0.0561974	0.0658968	0.0526925
AP_Breast_Colon.arff	150	0.458578	0.546482	0.425145		0.671378	0.755684	0.587655		0.549689	0.654662	0.530661		0.245911	0.288977	0.21585			0.0579142	0.0657557	0.05666		0.0418619	0.0412287	0.0422456		0.076076	0.0854062	0.0778651		0.0585983	0.0703341	0.0580053
AP_Breast_Colon.arff	175	0.433956	0.507017	0.38682		0.664978	0.757794	0.591003		0.421556	0.499114	0.389112		0.209644	0.238729	0.172056			0.0649843	0.0756202	0.0634538		0.0517131	0.0551538	0.0537487		0.0979769	0.116832	0.102446		0.0595628	0.0673538	0.0513454
AP_Breast_Colon.arff	200	0.467378	0.55149	0.425019		0.696978	0.786723	0.613608		0.489644	0.575559	0.455871		0.231289	0.273372	0.204559			0.0636748	0.0754201	0.067486		0.0433588	0.0420786	0.0422971		0.0922862	0.106505	0.0940551		0.0549503	0.0637631	0.0500621
AP_Breast_Colon.arff	225	0.504089	0.593109	0.459648		0.707378	0.800084	0.630262		0.522	0.616657	0.492062		0.2124	0.249683	0.185742			0.0537843	0.0597845	0.053248		0.0353931	0.0356819	0.0389584		0.0758737	0.0845008	0.0766783		0.0526061	0.0611655	0.0478373
AP_Breast_Colon.arff	250	0.489378	0.583422	0.456695		0.729156	0.827376	0.658828		0.4284	0.502718	0.394664		0.213244	0.251893	0.187822			0.055644	0.0635589	0.0564778		0.0390726	0.0368825	0.0412498		0.1307	0.155212	0.137871		0.0507707	0.0585126	0.0452408
AP_Breast_Colon.arff	275	0.513778	0.607233	0.47516		0.749689	0.837049	0.660136		0.467067	0.554948	0.442423		0.201422	0.234479	0.171677			0.0524581	0.0604439	0.0556885		0.0371603	0.0361883	0.0398888		0.105598	0.123887	0.11109		0.053727	0.0631537	0.0506514
AP_Breast_Colon.arff	300	0.541422	0.633176	0.493033		0.7768	0.872851	0.702739		0.497911	0.586364	0.467969		0.230578	0.269771	0.20057			0.0577788	0.064559	0.0576136		0.0325567	0.0272337	0.0332406		0.0922443	0.105569	0.0975552		0.0553681	0.0638411	0.0521327
AP_Breast_Colon.arff	325	0.528844	0.624161	0.490764		0.756578	0.855523	0.689656		0.470844	0.550701	0.436022		0.2088	0.246218	0.183833			0.0527438	0.0592893	0.0525971		0.0391172	0.0370976	0.0462135		0.100828	0.115783	0.104809		0.0558844	0.0642646	0.0498818
AP_Breast_Colon.arff	350	0.552133	0.650044	0.510308		0.776622	0.86984	0.69968		0.470356	0.556129	0.44349		0.197778	0.229775	0.169261			0.0523498	0.0572707	0.0502386		0.0305106	0.0267994	0.0366543		0.112515	0.133465	0.12129		0.0493884	0.0582639	0.0456465
AP_Breast_Colon.arff	375	0.549911	0.642718	0.503687		0.782267	0.878907	0.719765		0.460178	0.545534	0.435377		0.199467	0.236154	0.176335			0.0588388	0.0622955	0.0536362		0.0305699	0.0246989	0.0301225		0.102275	0.119513	0.107367		0.051444	0.059556	0.0461307
AP_Breast_Colon.arff	400	0.555111	0.651687	0.51283		0.8032	0.895325	0.730705		0.509822	0.603196	0.486488		0.206756	0.244591	0.181679			0.0512031	0.0547906	0.0511502		0.0299614	0.0238824	0.0295229		0.0907602	0.102269	0.0928093		0.0490349	0.05957	0.0488525
AP_Breast_Colon.arff	425	0.590178	0.697632	0.5549		0.802933	0.899685	0.74		0.513822	0.609338	0.488677		0.216667	0.255863	0.191135			0.0413709	0.0436446	0.0411201		0.0308005	0.0226963	0.0298249		0.0710724	0.080479	0.0741213		0.0503527	0.0586968	0.0475629
AP_Breast_Colon.arff	450	0.578933	0.683622	0.540764		0.804933	0.899425	0.738789		0.465511	0.548743	0.437435		0.187733	0.219016	0.16012			0.0579465	0.0637266	0.0575749		0.028813	0.0203118	0.0268978		0.111626	0.130291	0.115601		0.0487809	0.05564	0.0441148
AP_Breast_Colon.arff	475	0.593111	0.696657	0.551506		0.815644	0.905031	0.744832		0.491644	0.5807	0.465187		0.181956	0.214664	0.16007			0.0431867	0.0456156	0.043637		0.0274206	0.0203252	0.0273239		0.109548	0.126928	0.114732		0.0467695	0.0524559	0.0408485
AP_Breast_Colon.arff	500	0.5832	0.688893	0.545926		0.830133	0.921172	0.766869		0.479822	0.556886	0.44376		0.188311	0.22342	0.167306			0.0483882	0.0512555	0.0471893		0.0252759	0.0176438	0.0270405		0.112295	0.130801	0.11956		0.0497506	0.0577151	0.0451286
AP_Breast_Colon.arff	525	0.615733	0.721468	0.573481		0.831867	0.918721	0.760487		0.475822	0.561933	0.45339		0.197378	0.231738	0.17162			0.0432661	0.0467298	0.0453114		0.0291458	0.0215093	0.0301167		0.119715	0.136347	0.118396		0.0511685	0.058668	0.0449469
AP_Breast_Colon.arff	550	0.6156	0.721077	0.573541		0.829867	0.921757	0.773785		0.475689	0.559169	0.442409		0.177556	0.207105	0.153824			0.0406525	0.0414824	0.0407065		0.0285586	0.0181247	0.0250833		0.0961895	0.115565	0.104766		0.05076	0.0580778	0.0449583
AP_Breast_Colon.arff	575	0.604311	0.711866	0.570128		0.836844	0.925243	0.773115		0.456844	0.535092	0.422279		0.173111	0.205929	0.154432			0.047624	0.0490678	0.0463798		0.0253061	0.0165775	0.0249929		0.116918	0.136104	0.120358		0.0445067	0.0526299	0.042065
AP_Breast_Colon.arff	600	0.6228	0.730007	0.584637		0.847022	0.932712	0.784028		0.428533	0.497994	0.384502		0.179244	0.213362	0.161152			0.0407433	0.0421485	0.0410817		0.0239954	0.015024	0.0233244		0.12257	0.141785	0.126111		0.0476074	0.0542623	0.0440938
AP_Breast_Colon.arff	625	0.627289	0.734896	0.590503		0.842756	0.930312	0.785892		0.454178	0.53038	0.416906		0.173156	0.203327	0.149625			0.0421851	0.0420954	0.0419017		0.0288648	0.0187874	0.0257438		0.117592	0.138443	0.12402		0.048564	0.0571292	0.0444453

## Sheet: Breast_Kidney
		Stability																	Standard Deviation of Stability (Meta-stability)
		Signal-to-noise Filter				InfoGain Filter				RelifF Filter				SVM-RFE Filter					Signal-to-noise Filter				Info Gain Filter				RelifF Filter				SVM-RFE Filter
Dataset	NumSamples	Overlap	Overlap 2	Spearman		Overlap	Overlap 2	Spearman		Overlap	Overlap 2	Spearman		Overlap	Overlap 2	Spearman			Overlap	Overlap 2	Spearman		Overlap	Overlap 2	Spearman		Overlap	Overlap 2	Spearman		Overlap	Overlap 2	Spearman
AP_Breast_Colon.arff	50	0.323067	0.379836	0.286817		0.359111	0.418559	0.315747		0.299244	0.351268	0.263152		0.222533	0.253511	0.185956			0.0814472	0.0997678	0.0831549		0.0709296	0.0846003	0.0726393		0.099444	0.121534	0.100437		0.0583671	0.0693718	0.0550126
AP_Breast_Colon.arff	75	0.303733	0.355032	0.267023		0.387822	0.444247	0.331747		0.319111	0.379368	0.290167		0.202533	0.232272	0.170217			0.0936128	0.113433	0.0920685		0.0754989	0.0809915	0.0675574		0.108623	0.128474	0.103727		0.0605637	0.0705585	0.0553324
AP_Breast_Colon.arff	100	0.381289	0.445607	0.339489		0.436622	0.505874	0.38023		0.336444	0.396214	0.300203		0.230444	0.272038	0.204561			0.0829928	0.0984864	0.081309		0.0668254	0.0815194	0.0710905		0.10077	0.119238	0.100447		0.0591308	0.0675586	0.0534054
AP_Breast_Colon.arff	125	0.372222	0.437271	0.333677		0.432356	0.498877	0.374779		0.342533	0.40407	0.311277		0.189956	0.22307	0.16475			0.0858517	0.10303	0.0858559		0.0593196	0.0704785	0.0637057		0.118973	0.140395	0.116879		0.0608865	0.0721274	0.0561891
AP_Breast_Colon.arff	150	0.426889	0.505538	0.390768		0.561644	0.656	0.511838		0.3524	0.407884	0.310086		0.204978	0.239241	0.176018			0.0708966	0.082238	0.0691747		0.0531037	0.0596895	0.0550791		0.125882	0.151166	0.129422		0.0615051	0.0723513	0.0580377
AP_Breast_Colon.arff	175	0.439067	0.516716	0.396196		0.557778	0.651851	0.510983		0.357511	0.424726	0.330549		0.220533	0.24885	0.17995			0.0706078	0.0810553	0.0691392		0.0497713	0.0558833	0.0528158		0.0909331	0.108557	0.0957966		0.065555	0.0744635	0.0578069
AP_Breast_Colon.arff	200	0.469956	0.557544	0.433529		0.559111	0.657839	0.521404		0.319244	0.378503	0.29011		0.194311	0.222034	0.163802			0.0615425	0.0685538	0.0588388		0.0506784	0.0553551	0.0520941		0.116532	0.139604	0.115478		0.0545194	0.0630972	0.0491574
AP_Breast_Colon.arff	225	0.489556	0.570916	0.433697		0.621911	0.721964	0.574828		0.3988	0.466235	0.357114		0.202	0.23708	0.176864			0.0609468	0.0676533	0.0578251		0.0512529	0.0562368	0.0579389		0.100193	0.120894	0.105308		0.0593962	0.0677745	0.0537717
AP_Breast_Colon.arff	250	0.512133	0.597548	0.458904		0.596444	0.700569	0.562292		0.390711	0.458842	0.358299		0.207244	0.242765	0.179876			0.0544681	0.0619432	0.0555735		0.0524702	0.0534682	0.0502977		0.121377	0.142531	0.122411		0.0579876	0.0669076	0.0535724
AP_Breast_Colon.arff	275	0.535467	0.628421	0.488422		0.639644	0.7429	0.600539		0.398133	0.470069	0.365088		0.2068	0.240921	0.180319			0.0589678	0.0653947	0.0586197		0.0497943	0.0501219	0.0464468		0.10887	0.127516	0.108838		0.0599032	0.0684976	0.0524827
AP_Breast_Colon.arff	300	0.535378	0.62695	0.487666		0.652978	0.755647	0.608191		0.392	0.462424	0.357773		0.204756	0.235443	0.172763			0.0575061	0.0627729	0.0557577		0.0493078	0.0476764	0.0480982		0.116108	0.141907	0.123877		0.0623137	0.0717542	0.0569813
AP_Breast_Colon.arff	325	0.579333	0.682826	0.536259		0.661111	0.766933	0.622158		0.3836	0.446717	0.344191		0.183822	0.211152	0.155825			0.0401539	0.0465382	0.0432076		0.0428956	0.0410949	0.0408008		0.110027	0.129026	0.108792		0.0559731	0.0620559	0.0486387
AP_Breast_Colon.arff	350	0.576933	0.669301	0.520025		0.674667	0.785757	0.639585		0.402844	0.472984	0.365957		0.194311	0.225513	0.167475			0.0530507	0.0565764	0.0530568		0.0504482	0.0458731	0.0447692		0.111936	0.132702	0.11524		0.0563606	0.0631367	0.0494929
AP_Breast_Colon.arff	375	0.568756	0.665582	0.519765		0.668089	0.771214	0.619233		0.399156	0.46964	0.367165		0.183778	0.208665	0.152417			0.0500436	0.0538676	0.0496058		0.045352	0.0423181	0.04238		0.13258	0.157799	0.137885		0.0600558	0.0669467	0.0513704
AP_Breast_Colon.arff	400	0.568844	0.667836	0.527716		0.692444	0.802632	0.658167		0.372933	0.436862	0.338275		0.187467	0.214024	0.15706			0.0565579	0.0586034	0.0545059		0.0377651	0.0346644	0.0358353		0.116689	0.140924	0.121122		0.053303	0.0626093	0.0494429
AP_Breast_Colon.arff	425	0.582444	0.678019	0.532366		0.696978	0.806558	0.665203		0.411511	0.483841	0.377961		0.205956	0.236307	0.17541			0.0474581	0.0539382	0.0504771		0.0388499	0.0387017	0.0418119		0.102537	0.12249	0.107692		0.0563243	0.0652764	0.0522359
AP_Breast_Colon.arff	450	0.608356	0.703372	0.550978		0.6912	0.804815	0.665912		0.340844	0.39951	0.307204		0.183289	0.208052	0.150944			0.055637	0.0588271	0.0544615		0.0420657	0.0409403	0.043789		0.12792	0.156962	0.135839		0.0566665	0.0639937	0.0498371
AP_Breast_Colon.arff	475	0.613733	0.713239	0.559328		0.7168	0.829189	0.687198		0.3892	0.457051	0.357014		0.164444	0.19153	0.14069			0.0456892	0.0480853	0.0462895		0.0367614	0.0313609	0.0335194		0.112641	0.132281	0.114413		0.0516465	0.0604185	0.0483311
AP_Breast_Colon.arff	500	0.616089	0.716253	0.559468		0.715156	0.826648	0.688048		0.355022	0.417061	0.320109		0.165956	0.191159	0.140847			0.0579123	0.0666513	0.0617148		0.0426177	0.0381762	0.0421764		0.114238	0.136066	0.121009		0.0496992	0.0575374	0.0468894
AP_Breast_Colon.arff	525	0.619244	0.725328	0.576586		0.730756	0.844831	0.70785		0.3636	0.427294	0.330212		0.186178	0.214816	0.15889			0.0549375	0.0557645	0.0487124		0.034931	0.0277532	0.0308223		0.112224	0.136186	0.11694		0.0559182	0.0637503	0.0498856
AP_Breast_Colon.arff	550	0.640178	0.743134	0.588613		0.746	0.857688	0.721709		0.3492	0.410532	0.317939		0.183956	0.210965	0.154331			0.046427	0.0447579	0.0441824		0.0327458	0.0262501	0.0276575		0.123913	0.150059	0.128835		0.0534728	0.0599097	0.0467043
AP_Breast_Colon.arff	575	0.653867	0.755147	0.597394		0.737511	0.848468	0.713332		0.326089	0.387399	0.297692		0.159956	0.181888	0.131541			0.0487801	0.051474	0.0515739		0.0379415	0.032923	0.0351497		0.123987	0.143814	0.121982		0.0563628	0.063509	0.0502079
AP_Breast_Colon.arff	600	0.679467	0.77414	0.60815		0.743333	0.855391	0.718046		0.3544	0.417669	0.321562		0.166622	0.188713	0.137551			0.0351063	0.0349869	0.0381553		0.0376916	0.03194	0.0392247		0.122871	0.145897	0.125444		0.0588911	0.0649724	0.0488348

## Sheet: Colon_Kidney
		Stability																	Standard Deviation of Stability (Meta-stability)
		Signal-to-noise Filter				InfoGain Filter				RelifF Filter				SVM-RFE Filter					Signal-to-noise Filter				Info Gain Filter				RelifF Filter				SVM-RFE Filter
Dataset	NumSamples	Overlap	Overlap 2	Spearman		Overlap	Overlap 2	Spearman		Overlap	Overlap 2	Spearman		Overlap	Overlap 2	Spearman			Overlap	Overlap 2	Spearman		Overlap	Overlap 2	Spearman		Overlap	Overlap 2	Spearman		Overlap	Overlap 2	Spearman
AP_Breast_Colon.arff	50	0.287644	0.336011	0.254499		0.256089	0.286137	0.208878		0.239333	0.283317	0.212276		0.2028	0.236245	0.175353			0.0922183	0.110391	0.0905609		0.0783673	0.0867788	0.0697925		0.100517	0.118264	0.0968855		0.0683936	0.0796689	0.062891
AP_Breast_Colon.arff	75	0.342756	0.399206	0.298165		0.318889	0.357295	0.258999		0.271156	0.324156	0.250053		0.186889	0.219905	0.163929			0.0926197	0.112893	0.0925873		0.0897694	0.103865	0.0837642		0.100914	0.118164	0.095905		0.058857	0.0685913	0.0524985
AP_Breast_Colon.arff	100	0.420311	0.493428	0.377562		0.390356	0.443334	0.329103		0.333956	0.399087	0.308907		0.233333	0.272037	0.202549			0.0671414	0.0798657	0.0677396		0.0708701	0.0821689	0.0709675		0.0930278	0.103182	0.0849924		0.0676114	0.0780005	0.0621724
AP_Breast_Colon.arff	125	0.368667	0.428225	0.321523		0.378844	0.431239	0.317972		0.308756	0.36632	0.281425		0.196178	0.230651	0.171123			0.0784206	0.0944575	0.0784279		0.0703049	0.085641	0.0720289		0.0816452	0.0981796	0.080084		0.0559252	0.0650472	0.0519521
AP_Breast_Colon.arff	150	0.4584	0.53305	0.406337		0.432356	0.49769	0.373827		0.341822	0.403839	0.311251		0.224622	0.262642	0.194242			0.0708685	0.0816131	0.0703882		0.0681782	0.0789217	0.0685698		0.113856	0.136543	0.119262		0.0570832	0.065943	0.0525567
AP_Breast_Colon.arff	175	0.438844	0.516429	0.395457		0.458044	0.518397	0.384789		0.346	0.409923	0.315938		0.230533	0.267447	0.199926			0.0791796	0.0954083	0.0835163		0.058474	0.0692476	0.0614741		0.0873425	0.103765	0.0867497		0.0485833	0.0577764	0.0467692
AP_Breast_Colon.arff	200	0.466667	0.546223	0.415754		0.495733	0.565323	0.425387		0.361689	0.421728	0.320524		0.219689	0.25592	0.190496			0.0727251	0.0853501	0.0739762		0.0529543	0.0657297	0.0605679		0.0922043	0.111598	0.094848		0.0485437	0.0560746	0.0461954
AP_Breast_Colon.arff	225	0.512533	0.601658	0.469142		0.497422	0.571893	0.43151		0.3296	0.390115	0.300349		0.217378	0.256586	0.193098			0.060141	0.0681979	0.0608543		0.0586218	0.0748241	0.0700414		0.105926	0.129374	0.112426		0.0553418	0.0644976	0.0510584
AP_Breast_Colon.arff	250	0.518711	0.607187	0.474503		0.5728	0.660261	0.506441		0.388444	0.458549	0.35849		0.235822	0.280952	0.213002			0.0551452	0.0646913	0.0585868		0.0523763	0.0587323	0.0546998		0.0940546	0.112497	0.0971004		0.0552588	0.0639052	0.0519741
AP_Breast_Colon.arff	275	0.532844	0.62433	0.486891		0.551556	0.631946	0.477649		0.415644	0.494468	0.389132		0.213778	0.252488	0.188835			0.0545014	0.0630827	0.0573973		0.0508989	0.0575623	0.0563212		0.0786896	0.0948425	0.083162		0.0478696	0.0563078	0.0450315
AP_Breast_Colon.arff	300	0.564489	0.657431	0.511237		0.591511	0.681523	0.525677		0.411956	0.487895	0.385215		0.2328	0.273012	0.204904			0.0554435	0.0648814	0.0596778		0.0515674	0.054931	0.0516956		0.0862673	0.105578	0.0928501		0.0512128	0.0590023	0.047451
AP_Breast_Colon.arff	325	0.5588	0.655358	0.510426		0.603156	0.693512	0.53498		0.3808	0.447893	0.345714		0.222489	0.260247	0.193176			0.0537065	0.0568047	0.05004		0.0492624	0.0553255	0.0547815		0.0821439	0.100285	0.087669		0.0496403	0.0568979	0.0467214
AP_Breast_Colon.arff	350	0.576933	0.669052	0.519401		0.605556	0.694819	0.532693		0.421111	0.496271	0.38925		0.229911	0.268827	0.200274			0.0644538	0.0698313	0.0630946		0.0516854	0.0574881	0.0549365		0.0727734	0.0835286	0.0735788		0.0550591	0.0636581	0.0500675
AP_Breast_Colon.arff	375	0.586356	0.678334	0.526501		0.607378	0.702597	0.546965		0.420756	0.485218	0.375376		0.222356	0.261782	0.196819			0.0576026	0.064154	0.0594227		0.0493038	0.052808	0.0510796		0.0924734	0.108018	0.0936331		0.049396	0.0571549	0.045783
AP_Breast_Colon.arff	400	0.608267	0.703882	0.550749		0.620622	0.717269	0.557779		0.411333	0.484365	0.381779		0.240356	0.286241	0.216884			0.0468657	0.0493351	0.0455664		0.0453866	0.049837	0.0475323		0.0879423	0.103488	0.0909772		0.0464719	0.0553226	0.0462079
AP_Breast_Colon.arff	425	0.609956	0.706393	0.547203		0.638533	0.743945	0.585871		0.409333	0.480967	0.373738		0.232089	0.272287	0.203583			0.0485489	0.0525624	0.0502577		0.0487773	0.0518745	0.0526135		0.0943854	0.111802	0.098919		0.0471519	0.0567426	0.0465873
AP_Breast_Colon.arff	450	0.609289	0.703378	0.544551		0.646356	0.740909	0.577076		0.451689	0.529073	0.41795		0.226889	0.265702	0.195996			0.049957	0.0521168	0.0464736		0.0443374	0.0450077	0.0454885		0.0836788	0.100452	0.0918281		0.0452492	0.0510883	0.0410517
AP_Breast_Colon.arff	475	0.614889	0.709682	0.547523		0.653689	0.74975	0.582282		0.417556	0.494985	0.388291		0.224489	0.25835	0.191028			0.0514318	0.0565364	0.0544625		0.0481894	0.0468606	0.0457455		0.0810364	0.0948248	0.0841218		0.0472955	0.0533282	0.042355
AP_Breast_Colon.arff	500	0.631067	0.724833	0.564233		0.6584	0.764994	0.604502		0.430933	0.510536	0.406385		0.223022	0.260754	0.195544			0.0470322	0.0482143	0.0463515		0.0418107	0.0431737	0.0463668		0.0817172	0.0949354	0.0853884		0.0428041	0.0494454	0.0398679
AP_Breast_Colon.arff	525	0.657644	0.754143	0.587064		0.674756	0.775276	0.611309		0.454	0.535348	0.42824		0.213111	0.250584	0.187747			0.0435787	0.046368	0.04871		0.0433797	0.0447855	0.0457876		0.0825459	0.0967152	0.092081		0.0470831	0.0560812	0.0450653

## Sheet: Breast_Ovary
		Stability																	Standard Deviation of Stability (Meta-stability)
		Signal-to-noise Filter				InfoGain Filter				RelifF Filter				SVM-RFE Filter					Signal-to-noise Filter				Info Gain Filter				RelifF Filter				SVM-RFE Filter
Dataset	NumSamples	Overlap	Overlap 2	Spearman		Overlap	Overlap 2	Spearman		Overlap	Overlap 2	Spearman		Overlap	Overlap 2	Spearman			Overlap	Overlap 2	Spearman		Overlap	Overlap 2	Spearman		Overlap	Overlap 2	Spearman		Overlap	Overlap 2	Spearman
AP_Breast_Colon.arff	50	0.258	0.299528	0.224768		0.264667	0.315432	0.239257		0.2532	0.309217	0.238367		0.206311	0.244639	0.183259			0.0930978	0.112356	0.088733		0.0668079	0.0792295	0.0638626		0.0862151	0.105881	0.0878196		0.0509496	0.0600719	0.0488679
AP_Breast_Colon.arff	75	0.2692	0.315815	0.238232		0.367733	0.438755	0.334917		0.293733	0.357578	0.276053		0.231333	0.273785	0.203385			0.0824661	0.097897	0.0792679		0.0679993	0.0778305	0.0651583		0.0994747	0.118274	0.0963596		0.0496265	0.056853	0.045738
AP_Breast_Colon.arff	100	0.322889	0.383814	0.291516		0.454356	0.545566	0.426099		0.321111	0.382287	0.29284		0.223556	0.260035	0.191466			0.0846018	0.102579	0.0842122		0.0665401	0.0777681	0.0656613		0.107149	0.12713	0.106236		0.0484264	0.0557214	0.0457215
AP_Breast_Colon.arff	125	0.356444	0.42471	0.328956		0.493689	0.58935	0.460033		0.3776	0.458143	0.358408		0.254089	0.30295	0.227858			0.0693509	0.0821622	0.0686076		0.0618984	0.0705223	0.0619313		0.0887158	0.106581	0.0937347		0.0413114	0.0501142	0.0420673
AP_Breast_Colon.arff	150	0.419022	0.498437	0.386739		0.5612	0.669471	0.534841		0.393467	0.477609	0.373878		0.254622	0.301119	0.22518			0.0627548	0.0734195	0.0634588		0.0504532	0.0538602	0.052319		0.073181	0.0882887	0.0779288		0.0450911	0.0525127	0.0422436
AP_Breast_Colon.arff	175	0.370311	0.443862	0.344569		0.543867	0.638497	0.501691		0.353556	0.42392	0.327763		0.231511	0.269409	0.199536			0.0636086	0.0762491	0.0660728		0.0553879	0.060978	0.0565673		0.105004	0.127161	0.109532		0.0527443	0.0596114	0.0483162
AP_Breast_Colon.arff	200	0.418667	0.496876	0.383347		0.595022	0.708338	0.571294		0.384356	0.463796	0.363773		0.236444	0.27474	0.20257			0.0627923	0.0744543	0.0660568		0.0426162	0.04381	0.0417117		0.0828184	0.101077	0.0888926		0.0475783	0.0542067	0.0424987
AP_Breast_Colon.arff	225	0.454089	0.542264	0.425884		0.655022	0.764525	0.612033		0.427422	0.505039	0.391831		0.251333	0.28902	0.210883			0.0592584	0.0677	0.0597137		0.0422151	0.0428426	0.0461463		0.0791953	0.0936278	0.0810967		0.0544145	0.0619984	0.0488336
AP_Breast_Colon.arff	250	0.455467	0.536343	0.415678		0.640089	0.744006	0.595048		0.409511	0.490119	0.385948		0.222978	0.259567	0.189883			0.0633216	0.0720836	0.0623602		0.0466337	0.0476277	0.0480848		0.0814844	0.0941112	0.0818372		0.0445753	0.0508067	0.0409719
AP_Breast_Colon.arff	275	0.494178	0.589389	0.464372		0.677911	0.780175	0.627984		0.425689	0.510803	0.407368		0.256667	0.302733	0.224812			0.0515551	0.0566963	0.0494011		0.0424917	0.0418365	0.0433089		0.0877219	0.104429	0.0929894		0.0463354	0.0520544	0.0423724
AP_Breast_Colon.arff	300	0.507689	0.609375	0.485091		0.678356	0.784353	0.636342		0.444311	0.526075	0.413494		0.240311	0.285169	0.213232			0.0533927	0.0564826	0.0517314		0.0440401	0.0430373	0.0460393		0.066009	0.0806116	0.073344		0.0376352	0.0428027	0.0350556
AP_Breast_Colon.arff	325	0.506622	0.606951	0.482816		0.690133	0.803765	0.66811		0.437778	0.517684	0.405387		0.231156	0.274154	0.206351			0.0551881	0.060879	0.054825		0.0352769	0.0344482	0.037846		0.0596878	0.0681468	0.0607282		0.0450294	0.0525458	0.0422046
AP_Breast_Colon.arff	350	0.498533	0.594883	0.470873		0.689778	0.803501	0.662657		0.465867	0.55262	0.438815		0.211333	0.245497	0.179789			0.0535367	0.0546221	0.0470734		0.0450437	0.043119	0.0444272		0.0685701	0.079182	0.0710141		0.0450789	0.0505116	0.0401716
AP_Breast_Colon.arff	375	0.536533	0.634669	0.500826		0.712356	0.822863	0.678519		0.437956	0.512395	0.398975		0.216978	0.248869	0.180981			0.055878	0.0618192	0.0576769		0.0390044	0.0366208	0.0412274		0.0695773	0.0805136	0.0710552		0.0455361	0.0520845	0.0416596
AP_Breast_Colon.arff	400	0.535911	0.635088	0.507908		0.714444	0.82781	0.687916		0.452933	0.532827	0.416131		0.218533	0.25698	0.1913			0.0466464	0.0486655	0.0439692		0.0421574	0.0379569	0.0385182		0.0684145	0.0780262	0.0678272		0.0395429	0.0460073	0.0386216
AP_Breast_Colon.arff	425	0.529022	0.628051	0.500516		0.739556	0.854962	0.718779		0.463911	0.537211	0.419401		0.220978	0.254795	0.186347			0.04953	0.0525924	0.0479185		0.0361341	0.0307325	0.0331924		0.0769571	0.0899394	0.0795709		0.0455334	0.0524667	0.0415467
AP_Breast_Colon.arff	450	0.548622	0.649193	0.522062		0.734756	0.84373	0.703262		0.486	0.561606	0.441045		0.210444	0.245002	0.180405			0.0450094	0.0488933	0.0459027		0.0371368	0.0317442	0.034904		0.0588187	0.0615786	0.0540084		0.0468811	0.0509986	0.0406814
AP_Breast_Colon.arff	475	0.560267	0.658209	0.524566		0.725822	0.840911	0.70327		0.464622	0.538785	0.423136		0.200889	0.236581	0.175439			0.0471553	0.0500519	0.0483514		0.0410421	0.0371799	0.0391533		0.0550841	0.0651994	0.0604685		0.0386145	0.0472856	0.0385914
AP_Breast_Colon.arff	500	0.581822	0.686543	0.554403		0.747778	0.858253	0.719179		0.465067	0.534475	0.417406		0.217333	0.255581	0.189858			0.0441828	0.0429254	0.0391316		0.0369066	0.0296717	0.0332374		0.0632633	0.0740126	0.0646169		0.0465435	0.0522155	0.0416695
AP_Breast_Colon.arff	525	0.573822	0.67469	0.543787		0.760756	0.874318	0.74251		0.472756	0.548624	0.432476		0.201022	0.232628	0.171351			0.0465938	0.0486388	0.0427116		0.0332822	0.0261021	0.0280731		0.0650826	0.0745955	0.065785		0.0441364	0.0512747	0.0418433
